# Supplementary material for: Review of Marine Cyanobacteria and the Aspects Related to Their Roles: Chemical, Biological Properties, Nitrogen Fixation and Climate Change
Source: MDPI journal article supplement (doi:10.3390/md21080439), 2023-08-03
Supplement: s1 [file s1]

# Review of Marine Cyanobacteria and the Aspects Related to Their Roles: Chemical, Biological Properties, Nitro-gen Fixation and Climate Change

Hesham R. El-Seedi <sup>1,2,3,4,\*</sup>, Mohamed F. El-Mallah <sup>4</sup>, Nermeen Yosri <sup>5,6</sup>, Muaaz Alajlani <sup>7</sup>, Chao Zhao <sup>8</sup>, Muhammad A. Mehmood <sup>9</sup>, Ming Du <sup>10</sup>, Hammad Ullah <sup>11</sup>, Maria Daglia <sup>1,11</sup>, Zhiming Guo <sup>6</sup>, Shaden A. M. Khalifa <sup>1,12,\*</sup> and Qiyang Shou <sup>13,\*</sup>

<sup>1</sup> International Research Center for Food Nutrition and Safety, Jiangsu University, Zhenjiang 212013, China

<sup>2</sup> International Joint Research Laboratory of Intelligent Agriculture and Agri-Products Processing, Jiangsu University, Jiangsu Education Department, Nanjing 210024, China

<sup>3</sup> Department of Chemistry, Faculty of Science, Islamic University of Madinah, Madinah 42351, Saudi Arabia

<sup>4</sup> Department of Chemistry, Faculty of Science, Menoufia University, Shebin El-Kom 32512, Egypt; elmallahmohammed9994@yahoo.com

<sup>5</sup> Chemistry Department of Medicinal and Aromatic Plants, Research Institute of Medicinal and Aromatic Plants (RIMAP), Beni-Suef University, Beni-Suef 62514, Egypt; nermeen.yosri@rimp.bsu.edu.eg

<sup>6</sup> China Light Industry Key Laboratory of Food Intelligent Detection & Processing, School of Food and Biological Engineering, Jiangsu University, Zhenjiang 212013, China; guozhiming@ujs.edu.cn

<sup>7</sup> Faculty of Pharmacy, Al-Sham Private University, Damascus 0100, Syria; muaaz.alajlani.foph@aspu.edu.sy

<sup>8</sup> College of Marine Sciences, Fujian Agriculture and Forestry University, Fuzhou 350002, China; zhchao@live.cn

<sup>9</sup> Bioenergy Research Center, Department of Bioinformatics and Biotechnology, Government College University Faisalabad, Faisalabad 38000, Pakistan; draamer@gcuf.edu.pk

<sup>10</sup> School of Food Science and Technology, National Engineering Research Center of Seafood, Dalian Polytechnic University, Dalian 116034, China; duming@dlpu.edu.cn

<sup>11</sup> Department of Pharmacy, University of Napoli Federico II, Via D. Montesano 49, 80131 Naples, Italy

<sup>12</sup> Psychiatry and Psychology Department, Capio Saint Göran's Hospital, Sankt Göransplan 1, 112 19 Stockholm, Sweden

<sup>13</sup> Second Clinical Medical College, Jinhua Academy, Zhejiang Chinese Medical University, Hangzhou 310053, China

\* Correspondence: hesham.el-seedi@fkog.uu.se or hesham@kth.se (H.R.E.-S.); shaden.khalifa@regionstockholm.se (S.A.M.K.); shouqiyang@zcmu.edu.cn (Q.S.)

**Table S1.** Spectral analysis of isolated bioactive compounds with cytotoxicity targets between (2017 to 2022).

| Compound name/ Class                            | Spectral analysis                                                | Reference |
|-------------------------------------------------|------------------------------------------------------------------|-----------|
| Samoamide A, cyclic octapeptide (1)             | HRESIMS, IR, GNPS, 1D and 2D NMR                                 | [1]       |
| Odobromoamide, cyclo-depsipeptide (2)           | ESIMS, HRESIMS, 1D and 2D NMR                                    | [2]       |
| Samholide A, swinholides (3)                    | FT-IR, UV, HRESIMS, <sup>1</sup> H, <sup>13</sup> C NMR and GNPS | [3]       |
| Samholide B, swinholides (4)                    | FT-IR, UV, HRESIMS, <sup>1</sup> H, <sup>13</sup> C NMR and GNPS | [3]       |
| Samholide C, swinholides (5)                    | FT-IR, UV, HRESIMS, <sup>1</sup> H, <sup>13</sup> C NMR and GNPS | [3]       |
| Samholide D, swinholides (6)                    | FT-IR, UV, HRESIMS, <sup>1</sup> H, <sup>13</sup> C NMR and GNPS | [3]       |
| Samholide E, swinholides (7)                    | FT-IR, UV, HRESIMS, <sup>1</sup> H, <sup>13</sup> C NMR and GNPS | [3]       |
| Samholide F, swinholides (8)                    | FT-IR, UV, HRESIMS, <sup>1</sup> H, <sup>13</sup> C NMR and GNPS | [3]       |
| Samholide G, swinholides (9)                    | FT-IR, UV, HRESIMS, <sup>1</sup> H, <sup>13</sup> C NMR and GNPS | [3]       |
| Samholide H, swinholides (10)                   | FT-IR, UV, HRESIMS, <sup>1</sup> H, <sup>13</sup> C NMR and GNPS | [3]       |
| Samholide I, swinholides (11)                   | FT-IR, UV, HRESIMS, <sup>1</sup> H, <sup>13</sup> C NMR and GNPS | [3]       |
| Kakeromamide A, cyclic pentapeptide (12)        | HRFABMS, IR, <sup>1</sup> H NMR, HMBC, HMQC and LC-MS            | [4]       |
| Dragocin A, unique hybrid structural class (13) | HRESITOFMS, IR, 1D and 2D NMR                                    | [5]       |
| Dragocin B, unique hybrid structural class (14) | HRESITOFMS, IR, 1D and 2D NMR                                    | [5]       |
| Dragocin C, unique hybrid structural class (15) | HRESITOFMS, IR, 1D and 2D NMR                                    | [5]       |
| Dragocin D, unique hybrid structural class (16) | HRESITOFMS, IR, 1D and 2D NMR                                    | [5]       |
| Microcolin E, linear lipopeptide (17)           | LC-UV-MS/MS, <sup>1</sup> H and <sup>13</sup> C NMR              | [6]       |
| Microcolin F, linear lipopeptides (18)          | LC-UV-MS/MS, <sup>1</sup> H and <sup>13</sup> C NMR              | [6]       |
| Microcolin G, linear lipopeptides (19)          | LC-UV-MS/MS, <sup>1</sup> H and <sup>13</sup> C NMR              | [6]       |
| Microcolin H, linear lipopeptides (20)          | LC-UV-MS/MS, <sup>1</sup> H and <sup>13</sup> C NMR              | [6]       |
| Microcolin I, linear lipopeptides (21)          | LC-UV-MS/MS, <sup>1</sup> H and <sup>13</sup> C NMR              | [6]       |
| Microcolin J, linear lipopeptides (22)          | LC-UV-MS/MS, <sup>1</sup> H and <sup>13</sup> C NMR              | [6]       |
| Microcolin K, linear lipopeptides (23)          | LC-UV-MS/MS, <sup>1</sup> H and <sup>13</sup> C NMR              | [6]       |
| Microcolin L, linear lipopeptides (24)          | LC-UV-MS/MS, <sup>1</sup> H and <sup>13</sup> C NMR              | [6]       |
| Microcolin M, linear lipopeptides (25)          | LC-UV-MS/MS, <sup>1</sup> H and <sup>13</sup> C NMR              | [6]       |
| Oscillatoxin I, aplysiatoxin (26)               | 1D, 2D NMR, UV and HR-ESI-MS                                     | [7]       |

**Table S2.** Spectral analysis of isolated bioactive compounds with antiparasitic targets between (2017 to 2022).

| Compound name/ Class                                                             | Spectral analysis                                                                     | Reference |
|----------------------------------------------------------------------------------|---------------------------------------------------------------------------------------|-----------|
| Dudawalamide A, cyclic depsipeptide (27)                                         | LC-HRMS, HRESIMS, <sup>1</sup> H, <sup>13</sup> C, 2D NMR and DSQ/TRACE-GC-Ultra GCMS | [8]       |
| Dudawalamide B, cyclic depsipeptide (28)                                         | LC-HRMS, HRESIMS, <sup>1</sup> H, <sup>13</sup> C, 2D NMR and DSQ/TRACE-GC-Ultra GCMS | [8]       |
| Dudawalamide C, cyclic depsipeptide (29)                                         | LC-HRMS, HRESIMS, <sup>1</sup> H, <sup>13</sup> C, 2D NMR and DSQ/TRACE-GC-Ultra GCMS | [8]       |
| Dudawalamide D, cyclic depsipeptide (30)                                         | LC-HRMS, HRESIMS, <sup>1</sup> H, <sup>13</sup> C, 2D NMR and DSQ/TRACE-GC-Ultra GCMS | [8]       |
| Hoshinolactam, contain cyclopropane ring and a $\gamma$ -lactam ring system (31) | HRESIMS, <sup>1</sup> H, <sup>13</sup> C, COSY, HMQC, HMBC, and NOESY NMR             | [9]       |
| Mabuniamide, lipopeptide (32)                                                    | <sup>1</sup> H NMR, <sup>13</sup> C NMR, UV and HRESIMS                               | [10]      |
| Kakeromamide B, cyclic peptide (33)                                              | HRMS, qNMR, <sup>1</sup> H, <sup>13</sup> C, COSY, HSQC, and HMBC NMR                 | [11]      |

|                                                          |                                                                                                   |      |
|----------------------------------------------------------|---------------------------------------------------------------------------------------------------|------|
| Iheyamide A, linear peptides (34)                        | HRESIMS, 1D, 2D NMR, UV and IR                                                                    | [12] |
| Iheyamide B, linear peptides (35)                        | HRESIMS, 1D, 2D NMR, UV and IR                                                                    | [12] |
| Iheyamide C, linear peptides (36)                        | HRESIMS, 1D, 2D NMR, UV and IR                                                                    | [12] |
| Bromoiesol sulfate A, polyhalogenated aryl sulfates (37) | IR, <sup>1</sup> H NMR, <sup>13</sup> C NMR, TLC, HRESIMS, X rays, HMBC, HMQC and HRAPCIMS        | [13] |
| Bromoiesol sulfate B, polyhalogenated aryl sulfates (38) | IR, <sup>1</sup> H NMR, <sup>13</sup> C NMR, TLC, HRESIMS, X rays, HMBC, HMQC and HRAPCIMS        | [13] |
| Bromoiesol A, polyhalogenated aryl (39)                  | IR, <sup>1</sup> H NMR, <sup>13</sup> C NMR, TLC, HRESIMS, X rays, HMBC, HMQC and HRAPCIMS        | [13] |
| Bromoiesol B, polyhalogenated aryl (40)                  | IR, <sup>1</sup> H NMR, <sup>13</sup> C NMR, TLC, HRESIMS, X rays, HMBC, HMQC and HRAPCIMS        | [13] |
| Motobamide, cyclic peptide (41)                          | Optical rotations, UV, IR, <sup>1</sup> H NMR, <sup>13</sup> C NMR, HMQC, NOESY, HMBC and HRESIMS | [14] |

**Table S3.** Spectral analysis of isolated bioactive compounds with serine protease inhibition targets between (2017 to 2022).

| Compound name/ Compound description   | Spectral analysis                                                 | Reference |
|---------------------------------------|-------------------------------------------------------------------|-----------|
| Grassystatin D, peptides (42)         | <sup>1</sup> H, <sup>13</sup> C, 2D NMR, LCMS, HRESIMS and LC-TOF | [15]      |
| Grassystatin E, peptides (43)         | <sup>1</sup> H, <sup>13</sup> C, 2D NMR, LCMS, HRESIMS and LC-TOF | [15]      |
| Grassystatin F, peptides (44)         | <sup>1</sup> H, <sup>13</sup> C, 2D NMR, LCMS, HRESIMS and LC-TOF | [15]      |
| Jizanpeptin A, depsipeptides (45)     | HRTOFMS, LC-MS/MS, <sup>1</sup> H and <sup>13</sup> C NMR         | [16]      |
| Jizanpeptin B, depsipeptides (46)     | HRTOFMS, LC-MS/MS, <sup>1</sup> H and <sup>13</sup> C NMR         | [16]      |
| Jizanpeptin C, depsipeptides (47)     | HRTOFMS, LC-MS/MS, <sup>1</sup> H and <sup>13</sup> C NMR         | [16]      |
| Jizanpeptin D, depsipeptides (48)     | HRTOFMS, LC-MS/MS, <sup>1</sup> H and <sup>13</sup> C NMR         | [16]      |
| Jizanpeptin E, depsipeptides (49)     | HRTOFMS, LC-MS/MS, <sup>1</sup> H and <sup>13</sup> C NMR         | [16]      |
| Tutuillamide A, cyclic peptides (50)  | 1D, 2D NMR and HR-ESI-MS                                          | [17]      |
| Tutuillamides B, cyclic peptides (51) | 1D, 2D NMR and HR-ESI-MS                                          | [17]      |
| Tutuillamide C, cyclic peptides (52)  | 1D, 2D NMR and HR-ESI-MS                                          | [17]      |

**Table S4.** Spectral analysis of isolated bioactive compounds with antiproliferation and anticancer targets between (2017 to 2022).

| Compound name/ Compound description                | Spectral analysis                                                                                      | Reference |
|----------------------------------------------------|--------------------------------------------------------------------------------------------------------|-----------|
| Benderamide A, cyclic depsipeptide (53)            | HRESIMS, 1D and 2D NMR                                                                                 | [18]      |
| Lagunamide D, macrocyclic depsipeptide (54)        | 1D, 2D NMR and HRMS                                                                                    | [19]      |
| Portobelamide A, cyclic-depsipeptides (55)         | Optical rotations, UV, FTIR, LC-MS/MS, 1D, 2D NMR and HRESIMS                                          | [20]      |
| Portobelamide B, cyclic-depsipeptides(56)          | Optical rotations, UV, FTIR, LC-MS/MS, 1D, 2D NMR and HRESIMS                                          | [20]      |
| Caciqueamide, long chain lipopeptide (57)          | Optical rotations, UV, FTIR, LC-MS/MS, 1D, 2D NMR and HRESIMS                                          | [20]      |
| Dysidazirine carboxylic acid, carboxylic acid (58) | Optical rotations, UV, FTIR, <sup>1</sup> H NMR, <sup>13</sup> C NMR, HSQC, COSY, HMBC and HRESI/TOFMS | [21]      |

**Table S5.** Spectral analysis of isolated bioactive compounds with anti-quorum-sensing activity between (2017 to 2022).

| Compound name/ Compound description | Spectral analysis | Reference |
|-------------------------------------|-------------------|-----------|
|-------------------------------------|-------------------|-----------|

|                                            |                                                                                                   |      |
|--------------------------------------------|---------------------------------------------------------------------------------------------------|------|
| Trikoramide B, Decapeptide (59)            | Optical rotations, UV, FTIR, <sup>1</sup> H NMR, <sup>13</sup> C NMR, NOESY NMR and HRMS/MS       | [22] |
| Trikoramide C, Decapeptide (60)            | Optical rotations, UV, FTIR, <sup>1</sup> H NMR, <sup>13</sup> C NMR, NOESY NMR and HRMS/MS       | [22] |
| Trikoramide D, Decapeptide (61)            | Optical rotations, UV, FTIR, <sup>1</sup> H NMR, <sup>13</sup> C NMR, NOESY NMR and HRMS/MS       | [22] |
| Trikoveramide A, cyclic depsipeptides (62) | Optical rotations, UV, FTIR, <sup>1</sup> H NMR, <sup>13</sup> C NMR, HMBC and HR-ESI-Orbitrap MS | [23] |
| Trikoveramide B, cyclic depsipeptides (63) | Optical rotations, UV, FTIR, <sup>1</sup> H NMR, <sup>13</sup> C NMR, HMBC and HR-ESI-Orbitrap MS | [23] |
| Trikoveramide C, cyclic depsipeptides (64) | Optical rotations, UV, FTIR, <sup>1</sup> H NMR, <sup>13</sup> C NMR, HMBC and HR-ESI-Orbitrap MS | [23] |

**Table S6.** Spectral analysis of isolated bioactive compounds with antibacterial activity between (2017 to 2022).

| Compound name/ Compound description                          | Spectral analysis                                           | Reference |
|--------------------------------------------------------------|-------------------------------------------------------------|-----------|
| 2-hydroxyethyl-11-hydroxyhexadec-9-enoate, Not Reported (65) | HR-ESIMS, FT-IR, <sup>1</sup> H, <sup>13</sup> C and 2D NMR | [24]      |
| Tiahuramides A, cyclic depsipeptides (66)                    | HRMS, IR, FTIR, UV, 1D and 2D NMR                           | [25]      |
| Tiahuramide B, cyclic depsipeptides (67)                     | HRMS, IR, FTIR, UV, 1D and 2D NMR                           | [25]      |
| Tiahuramide C, cyclic depsipeptides (68)                     | HRMS, IR, FTIR, UV, 1D and 2D NMR                           | [25]      |

**Table S7.** Spectral analysis of isolated bioactive compounds with different activity between (2017 to 2022).

| Compound name/ Compound description                    | Spectral analysis                                                            | Reference |
|--------------------------------------------------------|------------------------------------------------------------------------------|-----------|
| Biseokeaniamide A, linear lipopeptides (69)            | IR, <sup>1</sup> H, <sup>13</sup> C NMR, HMQC, COSY, NOESY, HMBC and HRESIMS | [26]      |
| Biseokeaniamide B, linear lipopeptides (70)            | IR, <sup>1</sup> H, <sup>13</sup> C NMR, HMQC, COSY, NOESY, HMBC and HRESIMS | [26]      |
| Biseokeaniamide C, linear lipopeptides (71)            | IR, <sup>1</sup> H, <sup>13</sup> C NMR, HMQC, COSY, NOESY, HMBC and HRESIMS | [26]      |
| Serinolamide C, fatty acid amides (72)                 | ESITOFMS, <sup>1</sup> H, <sup>13</sup> C, 2D NMR and LC-MS                  | [27]      |
| Serinolamide D, fatty acid amides (73)                 | ESITOFMS, <sup>1</sup> H, <sup>13</sup> C, 2D NMR and LC-MS                  | [27]      |
| Lyngbyabellin O, Not reported (74)                     | ESITOFMS, <sup>1</sup> H, <sup>13</sup> C, 2D NMR and LC-MS                  | [27]      |
| Lyngbyabellin P, Not reported (75)                     | ESITOFMS, <sup>1</sup> H, <sup>13</sup> C, 2D NMR and LC-MS                  | [27]      |
| Columbamide D, chlorinated fatty acid amides (76)      | ESI-FTMS, 1D and 2D NMR                                                      | [28]      |
| Columbamide E, chlorinated fatty acid amides (77)      | ESI-FTMS, 1D and 2D NMR                                                      | [28]      |
| 6,8-di-O-acetylmal-yngamide 2, Malyngamide series (78) | HRESIMS, 1D and 2D NMR                                                       | [29]      |
| 6-O-acetylmal-yngamide 2, Malyngamide series (79)      | HRESIMS, 1D and 2D NMR                                                       | [29]      |
| N-demethyl-isomal-yngamide I, Malyngamide series (80)  | HRESIMS, 1D and 2D NMR                                                       | [29]      |
| Neo-debromoaplysi-atoxin A, polyketides (81)           | HR-ESI-MS, UV, X-ray, 1D and 2D NMR                                          | [30]      |
| Neo-debromoaplysi-atoxin B, polyketides (82)           | HR-ESI-MS, X-ray, 1D and 2D NMR                                              | [30]      |

|                                  |                                                                                     |      |
|----------------------------------|-------------------------------------------------------------------------------------|------|
| Croissamide, cyclic peptide (83) | HRESIMS, <sup>1</sup> H NMR, <sup>13</sup> C NMR, COSY, TOCSY, HMQC, HMBC and NOESY | [31] |
|----------------------------------|-------------------------------------------------------------------------------------|------|

## References

1. Naman, C.B.; Rattan, R.; Nikoulina, S.E.; Lee, J.; Miller, B.W.; Moss, N.A.; Armstrong, L.; Boudreau, P.D.; Debonisi, H.M.; Valeriote, F.A.; et al. Integrating Molecular Networking and Biological Assays To Target the Isolation of a Cytotoxic Cyclic Octapeptide, Samoamide A, from an American Samoan Marine Cyanobacterium. *J. Nat. Prod.* **2017**, *80*, 625–633, doi:10.1021/acs.jnatprod.6b00907.
2. Sueyoshi, K.; Kudo, T.; Yamano, A.; Sumimoto, S.; Iwasaki, A.; Suenaga, K.; Teruya, T. Odobromoamide, a terminal alkynyl bromide-containing cyclodepsipeptide from the marine cyanobacterium *Okeania* sp. *Bull. Chem. Soc. Jpn.* **2017**, *90*, 436–440.
3. Tao, Y.; Li, P.; Zhang, D.; Glukhov, E.; Gerwick, L.; Zhang, C.; Murray, T.F.; Gerwick, W.H. Samholides, Swinholide-Related Metabolites from a Marine Cyanobacterium cf. *Phormidium* sp. *J. Org. Chem.* **2018**, *83*, 3034–3046, doi:10.1021/acs.joc.8b00028.
4. Nakamura, F.; Maejima, H.; Kawamura, M.; Arai, D.; Okino, T.; Zhao, M.; Ye, T.; Lee, J.; Chang, Y.-T.; Fusetani, N.; et al. Kakeromamide A, a new cyclic pentapeptide inducing astrocyte differentiation isolated from the marine cyanobacterium *Moorea bouillonii*. *Bioorg. Med. Chem. Lett.* **2018**, *28*, 2206–2209, doi:https://doi.org/10.1016/j.bmcl.2018.04.067.
5. Choi, H.; Engene, N.; Byrum, T.; Hwang, S.; Oh, D.-C.; Gerwick, W.H. Dragocins A–D, Structurally Intriguing Cytotoxic Metabolites from a Panamanian Marine Cyanobacterium. *Org. Lett.* **2019**, *21*, 266–270, doi:10.1021/acs.orglett.8b03712.
6. Yu, H.-B.; Glukhov, E.; Li, Y.; Iwasaki, A.; Gerwick, L.; Dorrestein, P.C.; Jiao, B.-H.; Gerwick, W.H. Cytotoxic Microcolin Lipopeptides from the Marine Cyanobacterium *Moorea producens*. *J. Nat. Prod.* **2019**, *82*, 2608–2619, doi:10.1021/acs.jnatprod.9b00549.
7. Nagai, H.; Sato, S.; Iida, K.; Hayashi, K.; Kawaguchi, M.; Uchida, H.; Satake, M. Oscillatoxin I: A New Aplysiatoxin Derivative, from a Marine Cyanobacterium. *Toxins (Basel)*. **2019**, *11*, 366, doi:10.3390/toxins11060366.
8. Almaliti, J.; Malloy, K.L.; Glukhov, E.; Spadafora, C.; Gutiérrez, M.; Gerwick, W.H. Dudawalamides A–D, Antiparasitic Cyclic Depsipeptides from the Marine Cyanobacterium *Moorea producens*. *J. Nat. Prod.* **2017**, *80*, 1827–1836, doi:10.1021/acs.jnatprod.7b00034.
9. Ogawa, H.; Iwasaki, A.; Sumimoto, S.; Iwatsuki, M.; Ishiyama, A.; Hokari, R.; Otoguro, K.; Ōmura, S.; Suenaga, K. Isolation and total synthesis of hoshinolactam, an antitrypanosomal lactam from a marine cyanobacterium. *Org. Lett.* **2017**, *19*, 890–893.
10. Ozaki, K.; Iwasaki, A.; Sezawa, D.; Fujimura, H.; Nozaki, T.; Saito-Nakano, Y.; Suenaga, K.; Teruya, T. Isolation and Total Synthesis of Mabuniamide, a Lipopeptide from an *Okeania* sp. Marine Cyanobacterium. *J. Nat. Prod.* **2019**, *82*, 2907–2915, doi:10.1021/acs.jnatprod.9b00749.
11. Sweeney-Jones, A.M.; Gagaring, K.; Antonova-Koch, J.; Zhou, H.; Mojib, N.; Soapi, K.; Skolnick, J.; McNamara, C.W.; Kubanek, J. Antimalarial Peptide and Polyketide Natural Products from the Fijian Marine Cyanobacterium *Moorea producens*. *Mar. Drugs* **2020**, *18*, 167,

doi:10.3390/md18030167.

12. Kurisawa, N.; Iwasaki, A.; Jeelani, G.; Nozaki, T.; Suenaga, K. Iheyamides A–C, Antitrypanosomal Linear Peptides Isolated from a Marine Dapis sp. Cyanobacterium. *J. Nat. Prod.* **2020**, *83*, 1684–1690, doi:10.1021/acs.jnatprod.0c00250.
13. Ebihara, A.; Iwasaki, A.; Miura, Y.; Jeelani, G.; Nozaki, T.; Suenaga, K. Isolation and Total Synthesis of Bromoiesol sulfates, Antitrypanosomal arylethers from a Salileptolyngbya sp. Marine Cyanobacterium. *J. Org. Chem.* **2021**, *86*, 11763–11770, doi:10.1021/acs.joc.1c01214.
14. Takahashi, H.; Iwasaki, A.; Kurisawa, N.; Suzuki, R.; Jeelani, G.; Matsubara, T.; Sato, T.; Nozaki, T.; Suenaga, K. Motobamide, an Antitrypanosomal Cyclic Peptide from a Leptolyngbya sp. Marine Cyanobacterium. *J. Nat. Prod.* **2021**, *84*, 1649–1655, doi:10.1021/acs.jnatprod.1c00234.
15. Al-Awadhi, F.H.; Law, B.K.; Paul, V.J.; Luesch, H. Grassystatins D–F, Potent Aspartic Protease Inhibitors from Marine Cyanobacteria as Potential Antimetastatic Agents Targeting Invasive Breast Cancer. *J. Nat. Prod.* **2017**, *80*, 2969–2986, doi:10.1021/acs.jnatprod.7b00551.
16. Gallegos, D.A.; Saurí, J.; Cohen, R.D.; Wan, X.; Videau, P.; Vallota-Eastman, A.O.; Shaala, L.A.; Youssef, D.T.A.; Williamson, R.T.; Martin, G.E.; et al. Jizanpeptins, Cyanobacterial Protease Inhibitors from a Symploca sp. Cyanobacterium Collected in the Red Sea. *J. Nat. Prod.* **2018**, *81*, 1417–1425, doi:10.1021/acs.jnatprod.8b00117.
17. Keller, L.; Canuto, K.M.; Liu, C.; Suzuki, B.M.; Almaliti, J.; Sikandar, A.; Naman, C.B.; Glukhov, E.; Luo, D.; Duggan, B.M.; et al. Tutuilamides A–C: Vinyl-Chloride-Containing Cyclodepsipeptides from Marine Cyanobacteria with Potent Elastase Inhibitory Properties. *ACS Chem. Biol.* **2020**, *15*, 751–757, doi:10.1021/acscchembio.9b00992.
18. Ding, C.Y.; Ong, J.F.; Goh, H.C.; Coffill, C.R.; Tan, L.T. Benderamide A, a Cyclic Depsipeptide from a Singapore Collection of Marine Cyanobacterium cf. Lyngbya sp. *Mar. Drugs* **2018**, *16*.
19. Luo, D.; Putra, M.; Ye, T.; Paul, V.; Luesch, H. Isolation, Structure Elucidation and Biological Evaluation of Lagunamide D: A New Cytotoxic Macrocyclic Depsipeptide from Marine Cyanobacteria. *Mar. Drugs* **2019**, *17*, 83, doi:10.3390/md17020083.
20. Demirkiran, O.; Almaliti, J.; Leão, T.; Navarro, G.; Byrum, T.; Valeriote, F.A.; Gerwick, L.; Gerwick, W.H. Portobelamides A and B and Caciqueamide, Cytotoxic Peptidic Natural Products from a Caldora sp. Marine Cyanobacterium. *J. Nat. Prod.* **2021**, *84*, 2081–2093, doi:10.1021/acs.jnatprod.0c01383.
21. Gunasekera, S.P.; Kokkaliari, S.; Ratnayake, R.; Sauvage, T.; dos Santos, L.A.H.; Luesch, H.; Paul, V.J. Anti-Inflammatory Dysidazirine Carboxylic Acid from the Marine Cyanobacterium Caldora sp. Collected from the Reefs of Fort Lauderdale, Florida. *Mol.* **2022**, *27*.
22. Phyto, M.Y.; Goh, T.M.; Goh, J.X.; Tan, L.T. Trikoramides B–D, Bioactive Cyanobactins from the Marine Cyanobacterium Symploca hydnoidea. *Mar. Drugs* **2021**, *19*.
23. Phyto, M.Y.; Katermeran, N.P.; Goh, J.X.; Tan, L.T. Tricoveramides A–C, cyclic depsipeptides from the marine cyanobacterium Symploca hydnoidea. *Phytochemistry* **2021**, *190*, 112879, doi:https://doi.org/10.1016/j.phytochem.2021.112879.
24. Maneechote, N.; Yingyongnarongkul, B.; Suksamran, A.; Lumyong, S. Inhibition of *Vibrio* spp. by 2-Hydroxyethyl-11-hydroxyhexadec-9-enoate of Marine Cyanobacterium Leptolyngbya sp. LT19.

*Aquac. Res.* **2017**, *48*, 2088–2095, doi:10.1111/are.13043.

25. Levert, A.; Alvariño, R.; Bornancin, L.; Abou Mansour, E.; Burja, A.M.; Genevière, A.-M.; Bonnard, I.; Alonso, E.; Botana, L.; Banaigs, B. Structures and Activities of Tiahuramides A–C, Cyclic Depsipeptides from a Tahitian Collection of the Marine Cyanobacterium *Lyngbya majuscula*. *J. Nat. Prod.* **2018**, *81*, 1301–1310, doi:10.1021/acs.jnatprod.7b00751.
26. Iwasaki, A.; Tadenuma, T.; Sumimoto, S.; Ohshiro, T.; Ozaki, K.; Kobayashi, K.; Teruya, T.; Tomoda, H.; Suenaga, K. Biseoceaniamides A, B, and C, sterol O-acyltransferase inhibitors from an *Okeania* sp. marine cyanobacterium. *J. Nat. Prod.* **2017**, *80*, 1161–1166.
27. Petitbois, J.G.; Casalme, L.O.; Lopez, J.A. V; Alarif, W.M.; Abdel-Lateff, A.; Al-Lihaibi, S.S.; Yoshimura, E.; Nogata, Y.; Umezawa, T.; Matsuda, F.; et al. Serinolamides and Lyngbyabellins from an *Okeania* sp. Cyanobacterium Collected from the Red Sea. *J. Nat. Prod.* **2017**, *80*, 2708–2715, doi:10.1021/acs.jnatprod.7b00449.
28. Lopez, J.A. V; Petitbois, J.G.; Vairappan, C.S.; Umezawa, T.; Matsuda, F.; Okino, T. Columbamides D and E: Chlorinated Fatty Acid Amides from the Marine Cyanobacterium *Moorea bouillonii* Collected in Malaysia. *Org. Lett.* **2017**, *19*, 4231–4234, doi:10.1021/acs.orglett.7b01869.
29. Sueyoshi, K.; Yamano, A.; Ozaki, K.; Sumimoto, S.; Iwasaki, A.; Suenaga, K.; Teruya, T. Three new malyngamides from the marine cyanobacterium *Moorea producens*. *Mar. Drugs* **2017**, *15*, 367.
30. Han, B.-N.; Liang, T.-T.; Keen, L.J.; Fan, T.-T.; Zhang, X.-D.; Xu, L.; Zhao, Q.; Wang, S.-P.; Lin, H.-W. Two Marine Cyanobacterial Aplysiatoxin Polyketides, Neo-debromoaplysiatoxin A and B, with K<sup>+</sup> Channel Inhibition Activity. *Org. Lett.* **2018**, *20*, 578–581, doi:10.1021/acs.orglett.7b03672.
31. Iwasaki, K.; Iwasaki, A.; Sumimoto, S.; Sano, T.; Hitomi, Y.; Ohno, O.; Suenaga, K. Croissamide, a proline-rich cyclic peptide with an N-prenylated tryptophan from a marine cyanobacterium *Symploca* sp. *Tetrahedron Lett.* **2018**, *59*, 3806–3809.
